# Supplementary figures and images for: HTPheno: An image analysis pipeline for high-throughput plant phenotyping
Source: Springer Nature journal article supplement (doi:10.1186/1471-2105-12-148), 2011-05-12

# A Barke

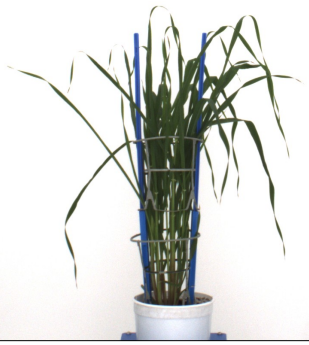

# B Morex

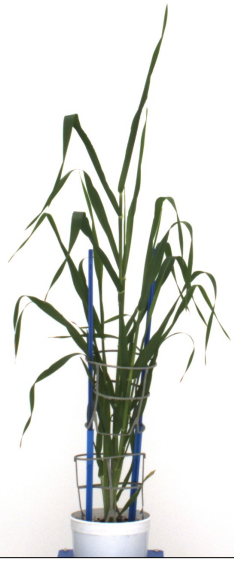

# C

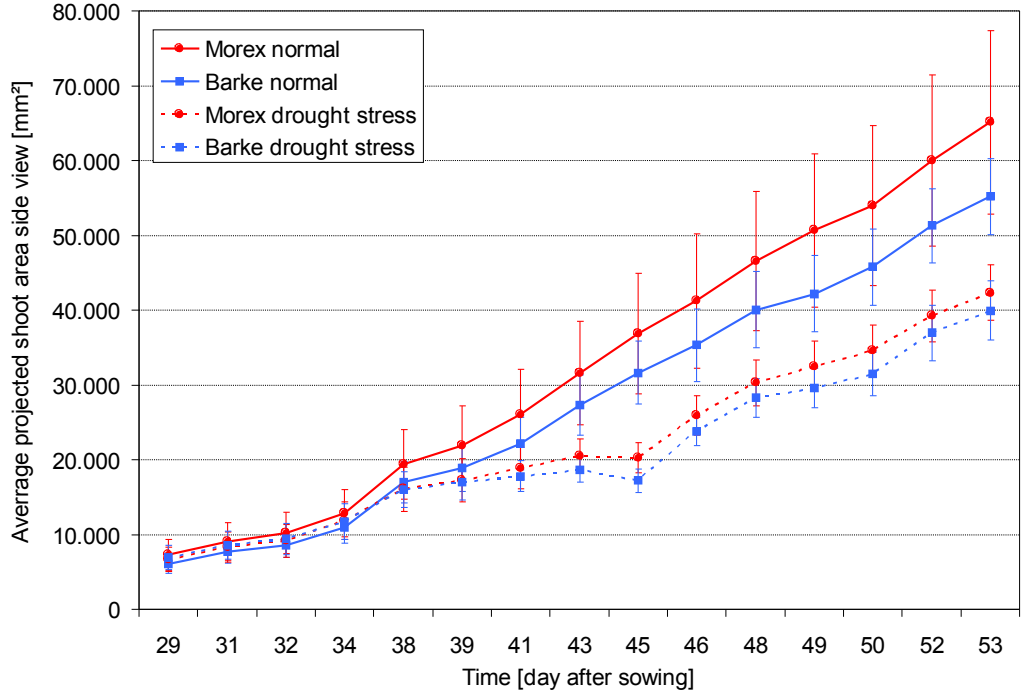

Supplement: 12859_2010_4527_MOESM5_ESM.pdf [file 12859_2010_4527_MOESM5_ESM.pdf]
